# Supplementary material for: A Comparison of Exposure Metrics for Traffic-Related Air Pollutants: Application to Epidemiology Studies in Detroit, Michigan
Source: PubMed Central journal article supplement (PMC4199035; doi:10.3390/ijerph110909553), 2014-09-15
Supplement: ijerph-11-09553-s001.pdf [file ijerph-11-09553-s001.pdf]

## A Comparison of Exposure Metrics for Traffic-Related Air Pollutants: Application to Epidemiology Studies in Detroit, Michigan

**Figure S1.** Distribution and maps of NO<sub>x</sub> emissions, defined as g/day for roads within 300 m of the home, coded by home group. High diesel roads are highlighted in yellow.

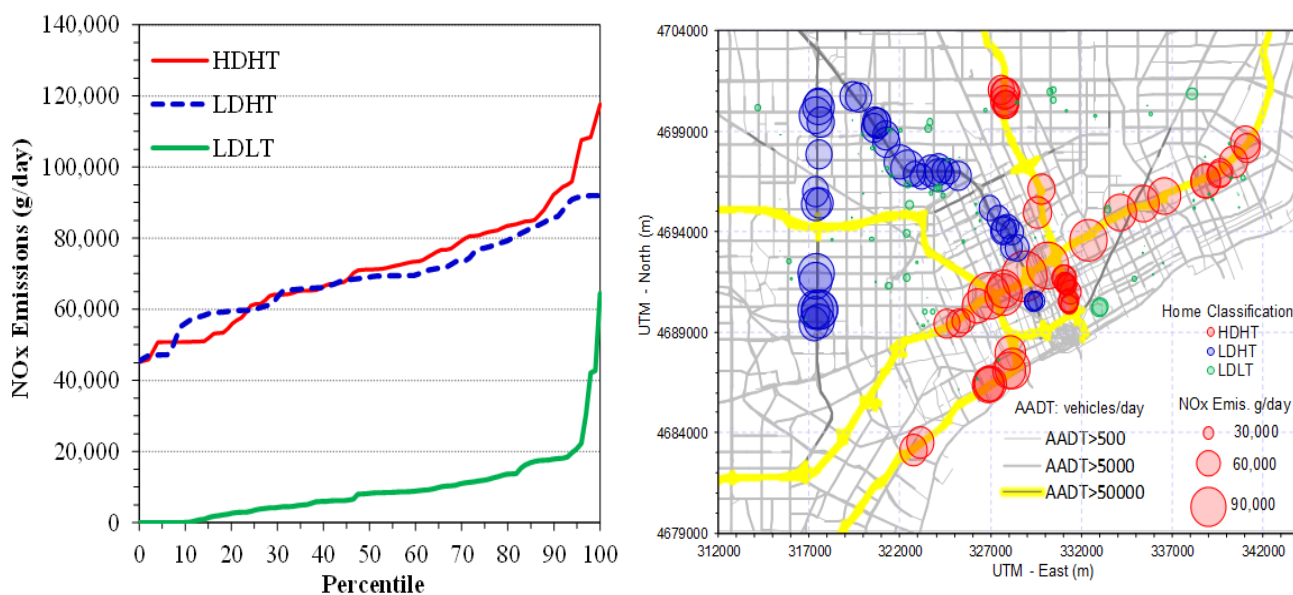

**Figure S2.** Distribution and maps of CO emissions, defined as g/day for roads within 300 m of the home, coded by home group. High diesel roads are highlighted in yellow.

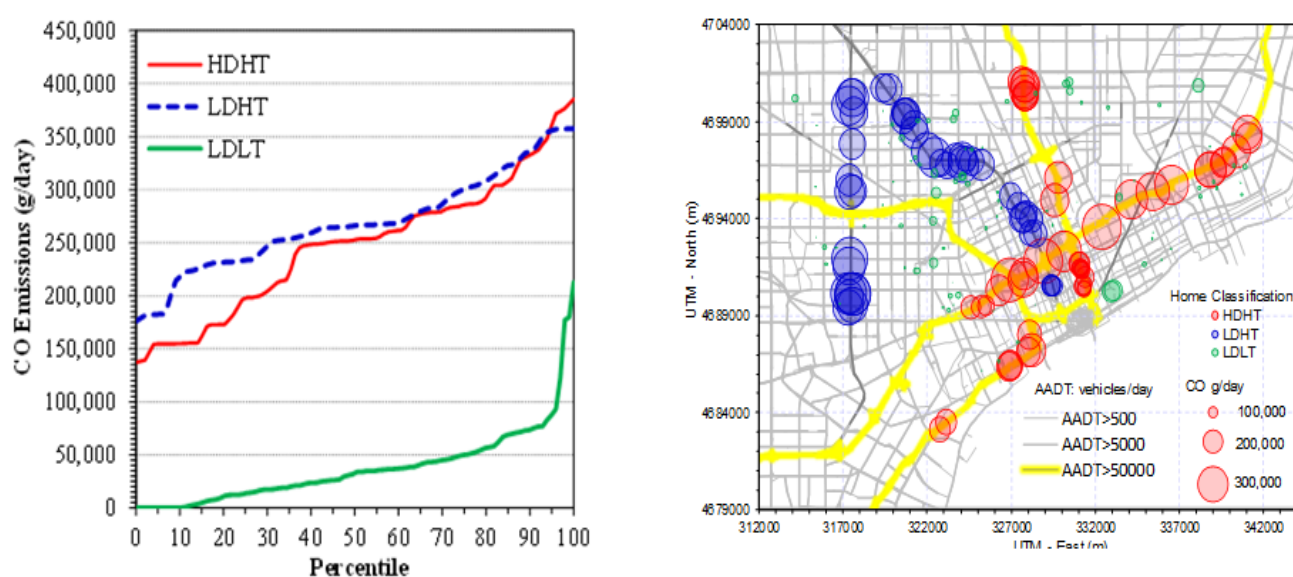

**Figure S3.** Distribution and maps of total annual average PM<sub>2.5</sub> predicted for 2010 from hybrid model. Each figure is coded by home group. High diesel roads are highlighted in yellow.

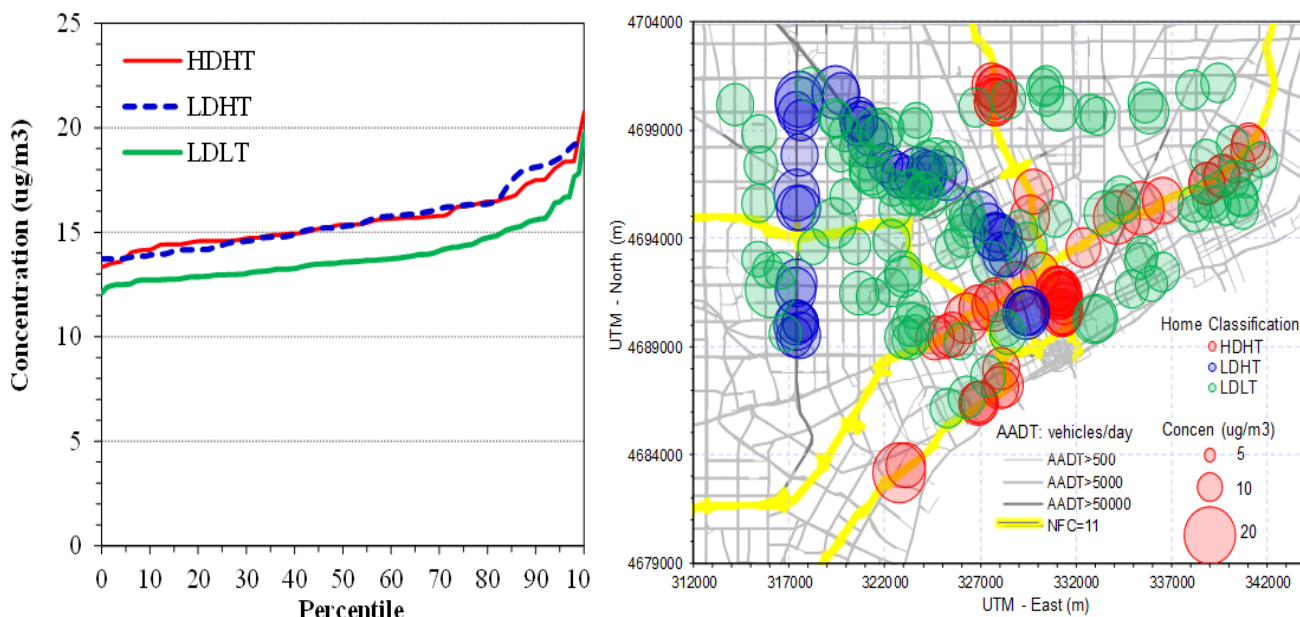

**Table S1.** Comparison of exposure metrics for NEXUS homes using rates of “severe” exposure misclassification in percent for tertiles and “thirds” groups. Shaded numbers show scores above 60% and 80%. Variable definitions as follows: Group = LDLT, LDHT and HDHT (assigned 1, 2, 3) categorical classification; Distance = m to nearest major highway; AADT = total traffic on nearest major highway; Lanes = number of lanes on nearest major highway; Diesel = diesel vehicles on nearest major highway; VKT = traffic density defined as vehicles-kilometers-traveled/day in 300 m buffer around home; PM Emis = PM<sub>2.5</sub> emissions in same buffer ; CO Emis = CO emissions in same buffer; PM Max = maximum 24-h PM<sub>2.5</sub> concentration; PM Ave = 2010 annual average PM<sub>2.5</sub> concentration. Sample size is *n* = 218, except for comparisons involving AADT, Lanes, Diesel metrics where *n* = 116 due to use of only high traffic homes.

| Type and Metric                                     | Group (group) | Distance (m) | AADT (veh/day) | Lanes (no) | Diesel (veh/day) | VKT (km/day) | PM Emis (g/day) | CO Emis (g/day) | PM Max (ug/m <sup>3</sup> ) | PM Ave (ug/m <sup>3</sup> ) |
|-----------------------------------------------------|---------------|--------------|----------------|------------|------------------|--------------|-----------------|-----------------|-----------------------------|-----------------------------|
| <b>Severe disagreement among tertiles (percent)</b> |               |              |                |            |                  |              |                 |                 |                             |                             |
| Distance                                            | 51            |              |                |            |                  |              |                 |                 |                             |                             |
| AADT                                                | 11            | 20           |                |            |                  |              |                 |                 |                             |                             |
| Lanes                                               | 31            | 7            | 19             |            |                  |              |                 |                 |                             |                             |
| Diesel                                              | 20            | 20           | 4              | 16         |                  |              |                 |                 |                             |                             |
| VKT                                                 | 47            | 1            | 11             | 9          | 22               |              |                 |                 |                             |                             |
| PM Emis                                             | 48            | 1            | 15             | 9          | 19               | 0            |                 |                 |                             |                             |
| CO Emis                                             | 47            | 1            | 15             | 10         | 19               | 0            |                 |                 |                             |                             |
| PM Max                                              | 46            | 2            | 15             | 8          | 16               | 1            | 1               | 1               |                             |                             |
| PM Ave                                              | 53            | 3            | 16             | 3          | 18               | 1            | 1               | 1               | 0                           |                             |

Table S1. Cont.

| Type and Metric                                  | Group (group) | Distance (m) | AADT (veh/day) | Lanes (no) | Diesel (veh/day) | VKT (km/day) | PM Emis (g/day) | CO Emis (g/day) | PM Max (ug/m <sup>3</sup> ) | PM Ave (ug/m <sup>3</sup> ) |
|--------------------------------------------------|---------------|--------------|----------------|------------|------------------|--------------|-----------------|-----------------|-----------------------------|-----------------------------|
| <b>Severe disagreement with thirds (percent)</b> |               |              |                |            |                  |              |                 |                 |                             |                             |
| Distance                                         | 33            |              |                |            |                  |              |                 |                 |                             |                             |
| AADT                                             | 66            | 34           |                |            |                  |              |                 |                 |                             |                             |
| Lanes                                            | 82            | 26           | 1              |            |                  |              |                 |                 |                             |                             |
| Diesel                                           | 57            | 25           | 0              | 3          |                  |              |                 |                 |                             |                             |
| VKT                                              | 1             | 33           | 51             | 65         | 50               |              |                 |                 |                             |                             |
| PM Emis                                          | 0             | 33           | 46             | 61         | 44               | 0            |                 |                 |                             |                             |
| CO Emis                                          | 1             | 33           | 52             | 65         | 51               | 0            | 0               |                 |                             |                             |
| PM Max                                           | 8             | 42           | 44             | 56         | 43               | 3            | 1               | 3               |                             |                             |
| PM Ave                                           | 4             | 46           | 50             | 62         | 48               | 6            | 2               | 7               | 0                           | 0                           |

© 2014 by the authors; licensee MDPI, Basel, Switzerland. This article is an open access article distributed under the terms and conditions of the Creative Commons Attribution license (<http://creativecommons.org/licenses/by/3.0/>).
